# Supplementary material for: Degradation of HK2 by chaperone-mediated autophagy promotes metabolic catastrophe and cell death
Source: PubMed Central journal article supplement — J Cell Biol. 2015 Aug 31;210(5):705–16. doi: 10.1083/jcb.201503044 (PMC4555813; doi:10.1083/jcb.201503044), 2015-08-31
Supplement: supp_jcb.201503044_JCB_201503044_sm.pdf [file supp_jcb.201503044_JCB_201503044_sm.pdf]

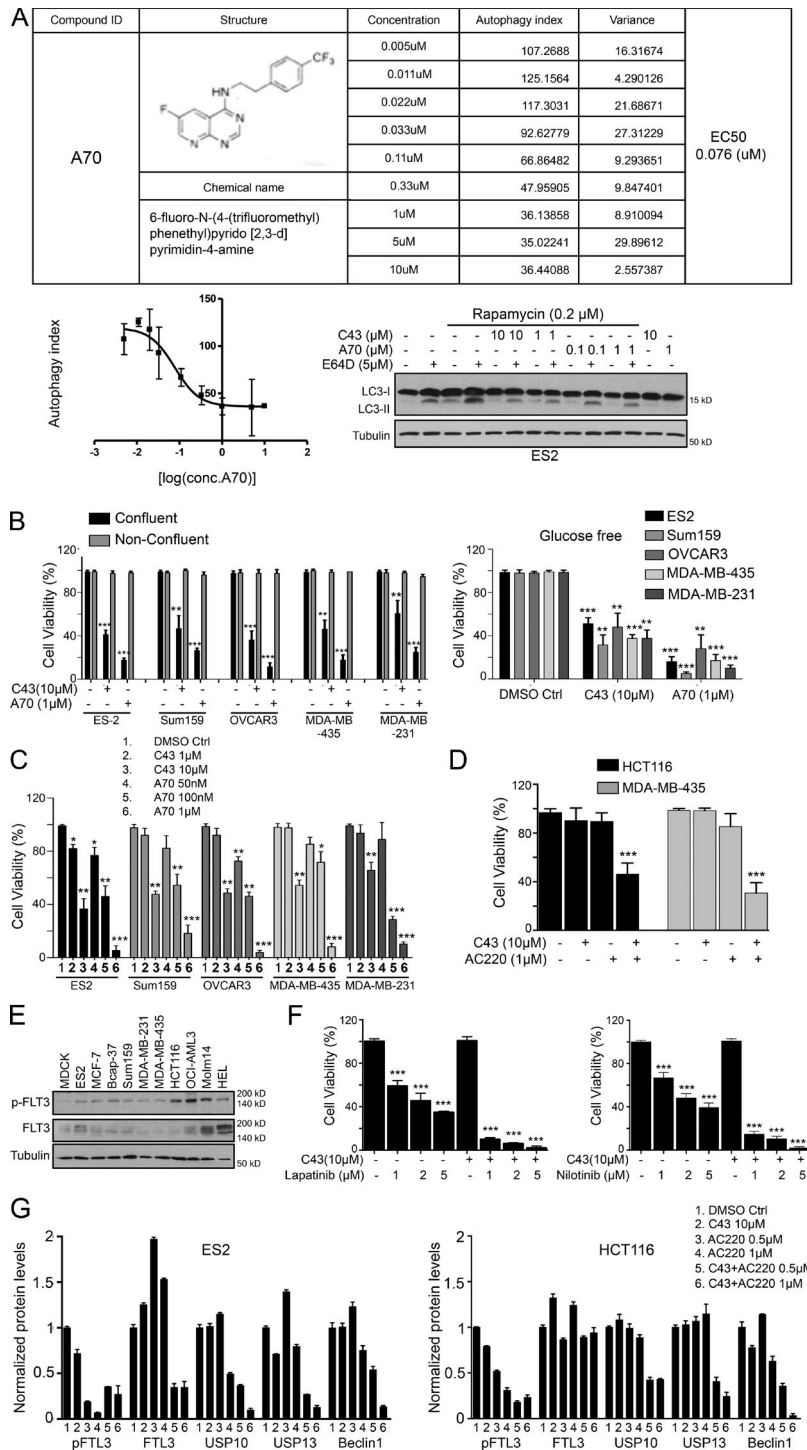

Figure S1. **Development of A70 as a novel and more potent autophagy inhibitor.** (A) The structure of A70 and autophagy index in response to A70 (μM). WB of LC3 protein levels in ES2 cells treated with increasing concentrations of A70 or C43 in the presence of rapamycin for 12 h is shown. (B) Cell viability (%) of indicated cells in confluent, nonconfluent (Non-C; 24 h), or glucose-free (6 h) conditions treated with C43 or A70. (C) Cell viability (%) of indicated cells in confluence treated with increasing concentration of A70 or C43 for 24 h. (D) Cell viability (%) of HCT116 and MDA-MB-435 cells treated with AC220 and C43 for 24 h. (E) Phospho- and total FLT3 protein levels of all indicated cell lines. (F) Cell viability (%) of ES2 cells treated with increasing concentrations of Lapatinib or Nilotinib and C43 for 16 h. (G) The quantification of protein degradation upon AC220 and/or C43 treatment presented in Fig. 1 H as bar graphs. Anti-α-tubulin was used as a loading control. Cells were treated with 0.1% DMSO (control: vehicle) or 1 μM AC220 and 10 μM C43, unless otherwise indicated. In all the experiments, treatment groups were compared with the control group, unless otherwise indicated. Error bars indicate ±SD. \*, P < 0.05; \*\*, P < 0.01; \*\*\*, P < 0.001.

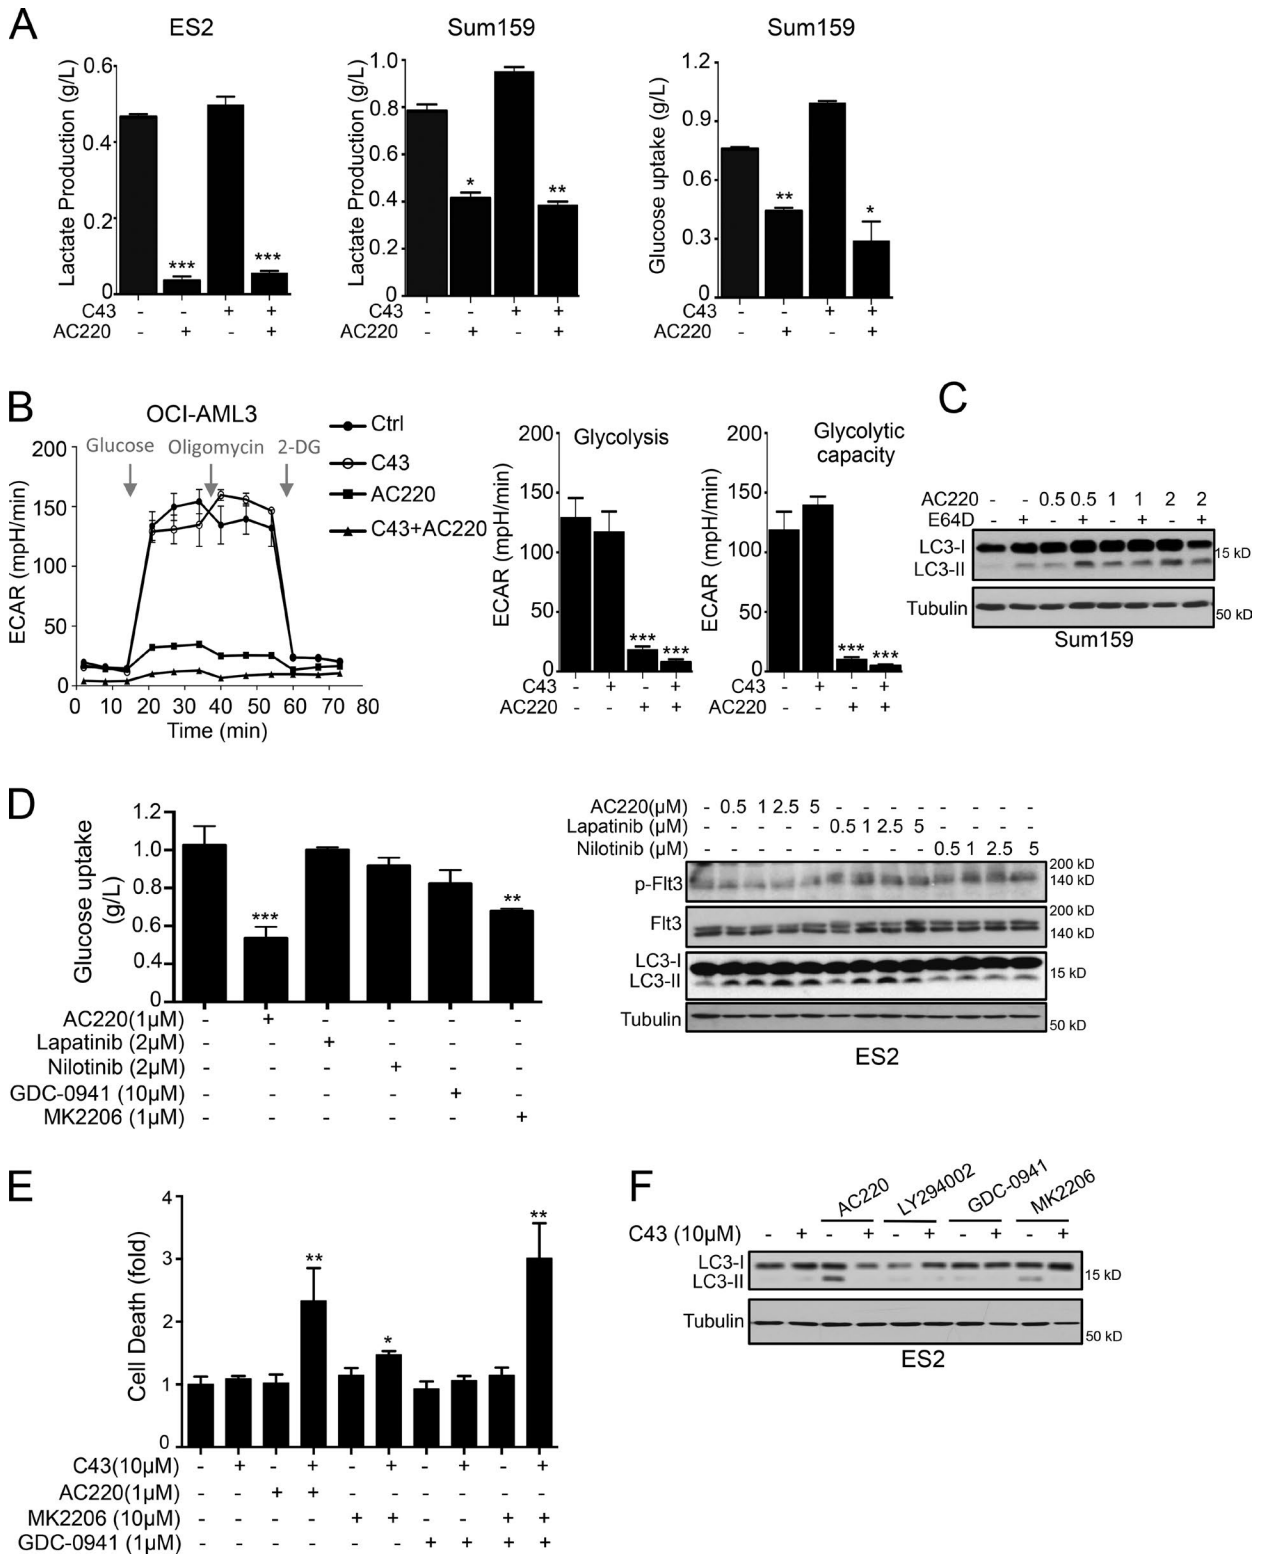

Figure S2. **The effect of combination treatment of AC220 and spautins on metabolism and cellular growth pathways.** (A) Relative changes of glucose or lactate levels in the cell medium of ES2 and Sum159 cells treated with AC220 and/or C43 (normalized to cell numbers) for 16 h. (B) The glycolytic activity and maximum glycolytic capacity of OCI-AML3 cells, determined by ECAR, after AC220 and C43 treatment for 8 h. (C) WB of LC3 protein levels in Sum159 cells, treated with increasing concentrations of AC220 in the presence or absence of 5 µM E64D for 16 h. (D) Relative changes of glucose levels in the culture medium of ES2 cells treated with the indicated inhibitors, and phospho- and total FLT3, LC3 protein levels in ES2 cells treated with increasing concentrations of AC220, Lapatinib, or Nilotinib for 16 h. (E) Cell death (fold) of ES2 cells treated with AC220, MK2206, or GDC-0941 for 24 h. (F) LC3 protein levels in ES2 cells treated with indicated inhibitors for 16 h. Anti- $\alpha$ -tubulin was used as a loading control. Cells were treated with 0.1% DMSO (control: vehicle) or 1 µM AC220 and 10 µM C43, unless otherwise stated. In all the experiments, treatment groups were compared with the control group, unless otherwise indicated. Error bars indicate  $\pm$ SD. \*,  $P < 0.05$ ; \*\*,  $P < 0.01$ ; \*\*\*,  $P < 0.001$ .

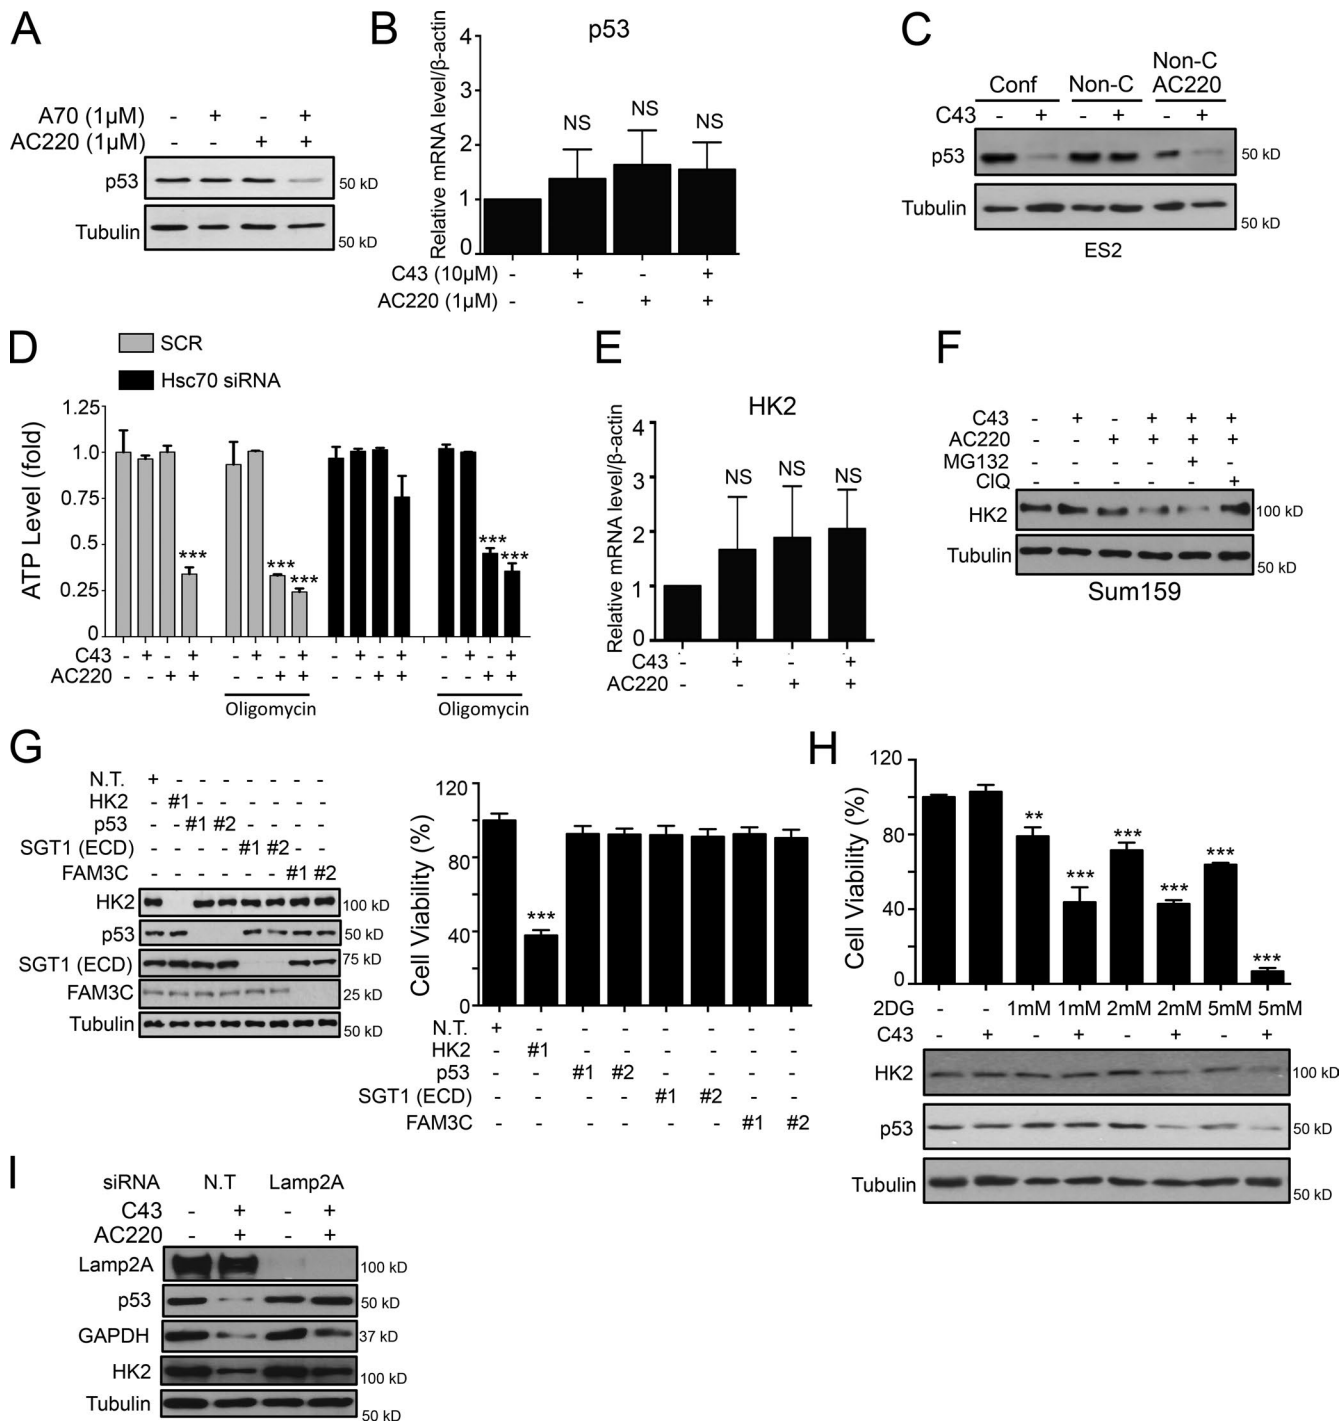

Figure S3. **The effect of combination treatment of AC220 and spautins on expression levels of proteins involved in metabolism and cell death.** (A) Mutant p53 levels in ES2 cells treated with AC220 and/or C43 for 24 h. (B) The levels of HK2 mRNAs in ES2 cells treated with AC220 and/or C43 for 16 h. (C) WB of the mutant p53 levels in ES2 cells treated with AC220 and/or C43 in different growth conditions for 24 h. (D) The cellular ATP levels in scramble (SCR) or Hsc70 siRNA-transfected ES2 treated with AC220 and/or C43 in the absence or presence of oligomycin for 16 h. (E) The expression levels of HK2 mRNAs in ES2 cells treated with AC220 and/or C43 for 16 h. (F) HK2 protein levels in Sum159 cells treated with AC220 and/or C43 for 24 h in the absence or presence of proteasome (MG132) or lysosomal inhibitor (CIQ). (G) Cell viability (%) of nontargeting (N.T.), HK2, p53, SGT1, or FAM3C siRNA-transfected ES2 cells treated with AC220 and/or C43 for 16 h. WB confirmed the siRNA knockdown efficiencies. (H) Cell viability (%) and WB of ES2 cells treated with indicated concentrations of 2DG and/or C43 for 16 h. (I) WB of HK2, p53, and GAPDH levels in ES2 cells transfected with nontargeting (N.T.) or Lamp2A siRNA, treated with AC220 and C43 for 12 h. Anti- $\alpha$ -tubulin was used as a loading control. Cells were treated with 0.1% DMSO (control: vehicle) or 1  $\mu$ M AC220 and 10  $\mu$ M C43, unless otherwise indicated. In all the experiments, treatment groups were compared with control group, unless otherwise shown. Error bars indicate  $\pm$ SD. \*\*,  $P < 0.01$ ; \*\*\*,  $P < 0.001$ .

Table S1. List of statistically significant (P < 0.05) proteins identified with a quantitative proteomics approach using TMT MS spectral data

| Fold decrease | P-value | Gene symbol | Gene description                                                        | CMA targeting motif                 |
|---------------|---------|-------------|-------------------------------------------------------------------------|-------------------------------------|
| 1.29          | 0.001   | RPL10A      | 60S ribosomal protein L10a                                              | QKDKR                               |
| 1.66          | 0.002   | EHD2        | EH domain-containing protein 2                                          | FRDIQ/NRRLF/QEELE                   |
| 1.25          | 0.002   | ABCF2       | ATP-binding cassette sub-family F member 2                              | KLELN                               |
| 1.38          | 0.003   | SPC24       | Kinetochore protein Spc24 (Fragment)                                    | QVVER                               |
| 2.21          | 0.004   | CKS2        | Cyclin-dependent kinases regulatory subunit 2                           | Not found                           |
| 1.53          | 0.004   | CENPK       | Centromere protein K                                                    | QKLRQ/NRLFD                         |
| 1.45          | 0.004   | ADI1        | 1,2-dihydroxy-3-keto-5-methylthiopentene dioxygenase                    | RRERN                               |
| 1.72          | 0.005   | CDC123      | Cell division cycle protein 123 homolog                                 | QKEEI/KLKRN                         |
| 1.34          | 0.005   | EHD1        | EH domain-containing protein 1                                          | QKIER/QELLQ                         |
| 1.21          | 0.005   | EIF4A2      | Eukaryotic initiation factor 4A-II                                      | RIDVQ/QKERD/VKKEE                   |
| 1.21          | 0.006   | HK2         | Hexokinase-2                                                            | QRFEK                               |
| 1.53          | 0.007   | CPA4        | Carboxypeptidase A4                                                     | NRPVD                               |
| 1.45          | 0.01    | RRM2        | Ribonucleoside-diphosphate reductase subunit M2                         | Not found                           |
| 1.21          | 0.01    | TXLNA       | $\alpha$ -Taxilin                                                       | QRLEK/FEFQ/NKRVQ                    |
| 1.29          | 0.012   | RB1         | Retinoblastoma-associated protein                                       | GKNIE/QKKKE/VLDLDE/                 |
| 1.23          | 0.012   | TRIO        | Isoform 4 of Triple functional domain protein                           | QKLLQ/NRLVE/LEELQ/NELFQ/VKLRD       |
| 1.2           | 0.012   | HSPA8       | Heat shock cognate 71 kD protein OS = Homo sapiens IHSPA8 PE = 1 SV = 1 | FEELN/QKLLQ/QKILD/QKELE             |
| 1.29          | 0.013   | ATXN10      | Ataxin-10                                                               | QRVLD                               |
| 1.50          | 0.014   | TMA7        | Translation machinery-associated protein 7                              | QKKLE                               |
| 1.60          | 0.015   | NOSIP       | Nitric oxide synthase-interacting protein (Fragment)                    | Not found                           |
| 1.49          | 0.015   | NUF2        | Kinetochore protein Nuf2 (Fragment)                                     | Not found                           |
| 1.97          | 0.016   | ECD         | Isoform 3 of Protein SGT1                                               | RLEVQ/QKYIE/QRFPV                   |
| 1.32          | 0.016   | DNAJA1      | DnaJ homolog subfamily A member 1                                       | VELVD                               |
| 1.21          | 0.017   | FKBP10      | Peptidyl-prolyl cis-trans isomerase FKBP10                              | Not found                           |
| 1.63          | 0.019   | COL6A1      | Collagen alpha-1(VI) chain                                              | QELKE                               |
| 1.49          | 0.021   | RPL30       | 60S ribosomal protein L30 (Fragment)                                    | Not found                           |
| 1.48          | 0.022   | EHD4        | EH domain-containing protein 4                                          | FRDIQ/NKKRE                         |
| 1.27          | 0.022   | H2BFS       | Histone H2B type F-S                                                    | Not found                           |
| 1.24          | 0.022   | TP53        | Isoform 7 of Cellular tumor antigen p53                                 | NLRVE/FRELN                         |
| 1.47          | 0.023   | COMMD9      | COMM domain-containing protein 9                                        | Not found                           |
| 1.28          | 0.023   | GPS1        | Isoform 3 of COP9 signalosome complex subunit 1                         | NVIKV                               |
| 2.18          | 0.027   | COLEC12     | Collectin-12                                                            | KEKVQ                               |
| 1.71          | 0.027   | ITGB5       | Integrin beta (Fragment)                                                | Not found                           |
| 1.34          | 0.03    | CAPRIN1     | Caprin-1                                                                | VLELQ/QRVQD                         |
| 1.23          | 0.03    | G3BP1       | Ras GTPase-activating protein-binding protein 1                         | KDFFQ/NVVEL/NVEEK/QRVRE             |
| 1.43          | 0.032   | PLAT        | Isoform 4 of Tissue-type plasminogen activator                          | NRVEY/QKFEV                         |
| 1.26          | 0.032   | TOMM34      | Mitochondrial import receptor subunit TOM34                             | QKLRQ                               |
| 1.34          | 0.033   | CSDE1       | Isoform 3 of Cold shock domain-containing protein E1                    | VKEVQ                               |
| 1.22          | 0.038   | NUP188      | Nucleoporin NUP188 homolog                                              | QDERQ/VDKLE                         |
| 1.27          | 0.039   | CKS1B       | Cyclin-dependent kinases regulatory subunit                             | Not found                           |
| 3.62          | 0.04    | SDF4        | Isoform 6 of 45 kD calcium-binding protein                              | KVDVN/QRWIM                         |
| 1.24          | 0.04    | CACNA1G     | Isoform 11 of Voltage-dependent T-type calcium channel subunit alpha-1G | QEVLE/NRLDF                         |
| 1.48          | 0.043   | MKI67       | Antigen KI-67                                                           | QKLDL/QKVEV/QELDQ/QKLDQ/VEKLD/VDVEE |
| 1.21          | 0.043   | PAPOLA      | Poly(A) polymerase $\alpha$                                             | VFEEE                               |
| 1.27          | 0.046   | FAM3C       | Protein FAM3C (fragment)                                                | QVFEI                               |
| 1.25          | 0.047   | DNAJB6      | Isoform C of DnaJ homolog subfamily B member 6                          | VEVEE                               |
| 1.74          | 0.049   | HAUS4       | HAUS augmin-like complex subunit 4                                      | QEVEE/QRLLQ/VEKVE                   |

Table S2 lists all WB quantifications (fold) for Figs. 1-5. Table S3 lists all WB quantifications (fold) for Figs. S1-S3. Both are available as Excel files.
